# Supplementary material for: Bacterial Diversity Associated With the Rhizosphere and Endosphere of Two Halophytes: Glaux maritima and Salicornia europaea
Source: Front Microbiol. 2018 Nov 28;9:2878. doi: 10.3389/fmicb.2018.02878 (PMC6282094; doi:10.3389/fmicb.2018.02878)
Supplement: Supplementary file 1 [file Table_1.XLSX]

## Sheet: TableS1
	Table S1. Characteristics of the effective tags from samples of rhizosphere bacteria and root endophytic bacteria associated with G. maritima or S. europaea.
	Sample	Sample origin	Plant species	Total raw reads	Number of tags	Total length (bp)	Average length (bp)	Total OTU
	Bl (GM) 1	Bulk control soil	G. maritima	498221	202702	1623833	418.838	3877
	Bl (GM) 2	Bulk control soil	G. maritima	531982	229686	1879336	418.747	4488
	Bl (GM) 3	Bulk control soil	G. maritima	510872	220137	1757554	418.665	4198
	Bl (GM) 4	Bulk control soil	G. maritima	663485	283713	2110292	418.709	5040
	Bl (SE) 1	Bulk control soil	S. europaea	534931	266481	990716	417.847	2371
	Bl (SE) 2	Bulk control soil	S. europaea	389021	193135	839399	417.819	2009
	Bl (SE) 3	Bulk control soil	S. europaea	633559	300518	995396	417.707	2383
	Bl (SE) 4	Bulk control soil	S. europaea	482467	234751	850690	417.824	2036
	Re (GM) 1	Root endosphere	G. maritima	1031483	472187	818672	417.264	1962
	Re (GM) 2	Root endosphere	G. maritima	549907	263924	447394	416.568	1074
	Re (GM) 3	Root endosphere	G. maritima	785724	366921	613294	417.207	1470
	Re (GM) 4	Root endosphere	G. maritima	574517	262804	533726	416.973	1280
	Rh (GM) 1	Rhizosphere	G. maritima	528369	237887	1804517	418.779	4309
	Rh (GM) 2	Rhizosphere	G. maritima	334380	142027	1236211	418.204	2956
	Rh (GM) 3	Rhizosphere	G. maritima	444642	169525	1443734	418.352	3451
	Rh (GM) 4	Rhizosphere	G. maritima	373192	157480	1307547	418.147	3127
	Re (SE) 1	Root endosphere	S. europaea	1138891	535377	1170771	417.09	2807
	Re (SE) 2	Root endosphere	S. europaea	949340	463866	962737	417.311	2307
	Re (SE) 3	Root endosphere	S. europaea	710914	348688	828655	417.458	1985
	Re (SE) 4	Root endosphere	S. europaea	1025336	475295	926060	417.897	2216
	Rh (SE) 1	Rhizosphere	S. europaea	457022	229470	900181	416.172	2163
	Rh (SE) 2	Rhizosphere	S. europaea	519166	245427	905960	416.725	2174
	Rh (SE) 3	Rhizosphere	S. europaea	542632	265847	1078835	417.022	2587
	Rh (SE) 4	Rhizosphere	S. europaea	456713	224413	1000280	417.653	2395
			Total value	14666766	6792261	27025790	⸺	64665
			Maximum value	1138891	535377	2110292	418.838	5040
			Minimum value	334380	142027	447394	416.172	1074
