# Supplementary material for: Bacterial Diversity Associated With the Rhizosphere and Endosphere of Two Halophytes: Glaux maritima and Salicornia europaea
Source: Front Microbiol. 2018 Nov 28;9:2878. doi: 10.3389/fmicb.2018.02878 (PMC6282094; doi:10.3389/fmicb.2018.02878)
Supplement: Supplementary file 3 [file Table_3.XLSX]

## Sheet: TableS3
	Table S3. Relative abundances (% of total good-quality sequences) of all classes in each sample across the two different halophytes.
	The more dominant classes (> 5% of high-quality sequences) and sub-dominant classes (> 1% of high-quality sequences) are shaded green and red, respectively.
	Phylum	Class	Bl (GM)	Rh (GM)	Re (GM)	Bl (SE)	Rh (SE)	Re (SE)
	Proteobacteria	Gammaproteobacteria	18.877	17.0508	18.6152	14.0365	21.8653	21.3372
	Proteobacteria	Alphaproteobacteria	14.2433	15.3678	18.2662	7.80555	17.6283	20.6619
	Proteobacteria	Deltaproteobacteria	11.1302	11.1311	5.97764	15.3919	14.2032	13.455
	Bacteroidetes	Flavobacteriia	9.03537	12.7735	6.8101	1.3637	8.45732	8.20712
	Planctomycetes	Planctomycetacia	6.47731	7.3351	3.29747	2.26711	4.34672	3.53428
	Bacteroidetes	Cytophagia	3.15026	2.83042	9.89466	2.202	1.33073	1.4206
	Actinobacteria	Actinobacteria	1.19312	1.93416	24.2526	1.65843	1.99874	1.47339
	Bacteroidetes	Sphingobacteriia	5.37629	4.1797	0.333287	1.11554	1.66818	1.36562
	Actinobacteria	Acidimicrobiia	3.06614	2.54169	1.36023	0.536958	1.71979	1.18631
	Acidobacteria	Holophagae	2.96153	1.74308	0.806895	1.28324	1.1192	1.25036
	Proteobacteria	Betaproteobacteria	1.89631	2.12226	3.20587	0.890036	0.100812	0.349832
	Chloroflexi	Ardenticatenia	1.83592	1.15007	0.837863	0.237516	0.186649	0.244061
	Verrucomicrobia	Verrucomicrobiae	1.56842	1.88695	0.266931	0.0835495	1.90876	0.454437
	Chloroflexi	Anaerolineae	1.48622	1.0507	0.181515	1.82967	1.51972	1.72366
	Chloroflexi	S085	1.04301	0.313032	0.00763656	0.0203886	0.00413683	0.0135316
	Deferribacteres	Deferribacteres Incertae Sedis	0.893323	0.762779	0.0823184	8.02233	0.431415	1.06521
	Bacteroidetes	Bacteroidia	0.222983	0.314014	0.00455588	3.93024	3.03982	2.75983
	Fibrobacteres	Fibrobacteria	0.307907	0.158587	0.00130871	2.99822	0.12684	0.161443
	Proteobacteria	Epsilonproteobacteria	0.29088	0.545693	0.671635	1.15165	0.691441	2.51159
	Ignavibacteriae	Ignavibacteria	0.270373	0.331843	0.000875964	2.98127	0.34084	0.442091
	Bacteroidetes	SB-5	0.0774586	0.226281	0.0768714	4.83132	0.83544	1.05191
	Spirochaetae	Spirochaetes	0.0774534	0.144128	0.0374544	2.60552	0.800892	1.18818
	Proteobacteria	Proteobacteria Incertae Sedis	0.0748354	0.0685197	0.0010067	2.58745	0.907487	0.941793
	Cyanobacteria	Cyanobacteria	0.738465	0.179521	0.00698423	0.439119	1.11604	1.23411
	Acidobacteria	Blastocatellia	0.570585	1.00846	0.0646969	0	0.00414269	0.0011465
	Chlamydiae	Chlamydiae	0.370359	1.12592	0.1174	0.960377	0.954088	1.54137
	Actinobacteria	Thermoleophilia	0.197177	0.147688	1.60684	0.198213	0.152087	0.178338
	Bacteroidetes	Bacteroidetes VC2.1 Bac22	0.0222853	0.0149337	0.00020134	0.428503	1.01116	0.693367
	Planctomycetes	Phycisphaerae	0.857001	0.875024	0.287594	0.97789	0.677111	0.729959
	Proteobacteria	Skagenf62	0.823415	0.612931	0.0192715	0	0	0
	Chloroflexi	JG30-KF-CM66	0.638757	0.382702	0.0218198	0.0434912	0.0013774	0.0219849
	Bacteroidetes	Bacteroidetes Incertae Sedis	0.604843	0.511247	0.0177463	0.390911	0.126156	0.178823
	Acidobacteria	Subgroup 9	0.532615	0.346489	0.00575083	0.00374728	0	0.000723063
	Planctomycetes	OM190	0.454717	0.405502	0.0509986	0.29877	0.121223	0.143111
	Verrucomicrobia	Opitutae	0.450766	0.29339	0.246042	0.720532	0.541932	0.808221
	Nitrospirae	Nitrospira	0.373388	0.475288	0.0116899	0.561209	0.0196591	0.000309884
	Chloroflexi	Caldilineae	0.328841	0.485684	0.0906673	0.112057	0.931337	0.477366
	Gemmatimonadetes	BD2-11 terrestrial group	0.328305	0.134071	0.00181206	0.481435	0.0873665	0.101456
	Verrucomicrobia	OPB35 soil group	0.327529	0.393535	0.0271487	0.0176093	0.00559294	0.0399614
	Chlorobi	Chlorobia	0.327271	0.406627	0.026732	0.211509	0.155542	0.0842295
	Acidobacteria	Subgroup 22	0.309143	0.196032	0.00840293	0.00190871	0	0.00224242
	Chloroflexi	Gitt-GS-136	0.291905	0.0932341	0.00237599	0.128858	0.00428004	0.000516473
	Acidobacteria	Solibacteres	0.241898	0.18153	0.00863874	0.00256801	0.00222473	0.00448076
	Firmicutes	Clostridia	0.228156	0.217976	0.0374105	0.224751	0.545742	0.328336
	Firmicutes	Bacilli	0.18863	0.0792946	0.00696048	0.0374188	0.0644437	0.164629
	Proteobacteria	MACA-EFT26	0.16132	0.0126279	0.00175193	0	0	0.000309884
	Chloroflexi	SAR202 clade	0.155464	0.0262941	0	0	0	0
	Gemmatimonadetes	Gemmatimonadetes	0.152205	0.174636	0.00617665	0.00644627	0.0214358	0.0151468
	Acidobacteria	Subgroup 17	0.144801	0.0932248	0.0353274	0	0.000558657	0.000707647
	Chloroflexi	Thermomicrobia	0.144552	0.199757	0.0227364	0.141497	0.140048	0.120926
	Actinobacteria	Nitriliruptoria	0.12281	0.0819843	0.00556904	0.277472	0.635562	0.286587
	Acidobacteria	Subgroup 21	0.119546	0.194568	0.0118355	0.499265	0.140742	0.0813301
	Acidobacteria	AT-s3-28	0.117387	0.118215	0.000493328	0.00204916	0	0
	Proteobacteria	AEGEAN-245	0.114657	0.331948	0.796626	0	0.0135369	0.115811
	Tectomicrobia	Tectomicrobia Incertae Sedis	0.105491	0.0564301	0.000731775	0	0	0
	Cyanobacteria	Melainabacteria	0.100501	0.126868	0.00914719	0.0106367	0.012454	0.00823738
	Parcubacteria	Candidatus Magasanikbacteria	0.0830644	0.0461819	0.000583976	0.0692634	0.00898268	0.00328192
	Planctomycetes	vadinHA49	0.0822048	0.0453419	0.00221474	0.104857	0.039392	0.0944599
	Proteobacteria	SPOTSOCT00m83	0.0797991	0.0709753	0.00537997	0.0194514	0.0179287	0.0263023
	Omnitrophica	Omnitrophica Incertae Sedis	0.071894	0.0237537	0.00718321	0.0251178	0.0013774	0.0285495
	Proteobacteria	JTB23	0.067457	0.0282735	0.00110737	0	0	0.00199168
	Elusimicrobia	Elusimicrobia	0.0660887	0.0233553	0	0.0068932	0.000688698	0.0024745
	Verrucomicrobia	WCHB1-41	0.0639086	0.0472716	0.002084	0.10005	0.317333	0.0723862
	Chloroflexi	KD4-96	0.0603156	0.119745	0.00495725	0.0779241	0.00807912	0.00844025
	Peregrinibacteria	Candidatus Peribacteria	0.0600558	0.222516	0.00521886	0.0668777	0.0628097	0.011907
	Gemmatimonadetes	AKAU4049	0.0589171	0.0577024	0.00121673	0	0	0
	Bacteroidetes	Bacteroidetes BD2-2	0.0573317	0.0771218	0.02352	0.138577	0.129646	0.115312
	Deinococcus-Thermus	Deinococci	0.0564536	0.0667622	0	0.286634	0.420509	0.0626505
	Acidobacteria	Subgroup 5	0.0541883	0.0163356	0	0	0	0
	Planctomycetes	Pla3 lineage	0.0534498	0.0617603	0.00956822	0.0144519	0	0
	Bacteroidetes	WCHB1-32	0.0453807	0.00140045	0.00072997	0.0384261	0.00722052	0.00656983
	Parcubacteria	Candidatus Moranbacteria	0.043171	0.0023081	0.000583976	0.617001	0.13976	0.0368889
	Acidobacteria	Subgroup 26	0.0425164	0.032004	0.00020134	0	0	0
	Planctomycetes	BD7-11	0.0406069	0.045448	0.0269259	0.0610895	0.0152168	0.125903
	Acidobacteria	Subgroup 6	0.0385185	0.0886705	0	0.0664143	0.00594688	0.00950311
	Parcubacteria	Candidatus Kuenenbacteria	0.0365328	0.076578	0.00558131	0.240892	0.0459574	0.0767207
	Microgenomates	Candidatus Pacebacteria	0.0365013	0.0910169	0.00846292	0.0832215	0.0417098	0.0552399
	Verrucomicrobia	Spartobacteria	0.035024	0.142756	0.192031	0	0.00783504	0.0118913
	Gemmatimonadetes	S0134 terrestrial group	0.0338286	0.0347313	0	0.110347	0.00511946	0.00795369
	Planctomycetes	Pla4 lineage	0.0336427	0.0322016	0.00741836	0.203128	0.218847	0.166468
	Verrucomicrobia	R76-B128	0.0331345	0.0204163	0.0288178	0.109829	0.0591039	0.206234
	Parcubacteria	Candidatus Campbellbacteria	0.0317179	0.0479974	0.0118754	0.214147	0.0473677	0.00568121
	Planctomycetes	028H05-P-BN-P5	0.029005	0.0720783	0.00710573	0	0.000446925	0
	Nitrospinae	Nitrospinia	0.0286701	0.0095019	0.00072997	0	0	0
	Parcubacteria	Candidatus Nomurabacteria	0.026976	0.047635	0.00102196	0.0616992	0.0268791	0.0120799
	Verrucomicrobia	Verrucomicrobia Incertae Sedis	0.0221952	0.00291056	0.00757185	0.00150316	0.0197435	0.00611195
	Microgenomates	Candidatus Levybacteria	0.0163294	0.0246722	0	0.00538969	0	0.000235882
	Gemmatimonadetes	PAUC43f marine benthic group	0.0160919	0.00131662	0	0.00209647	0	0
	Firmicutes	Erysipelotrichia	0.0153301	0.0232182	0.673386	0	0	0
	Lentisphaerae	Oligosphaeria	0.0147615	0.00269851	0	0.0688149	0.0255726	0.0357232
	Armatimonadetes	Fimbriimonadia	0.0117234	0.0158485	0.0087583	0	0	0.00340872
	Microgenomates	Candidatus Woesebacteria	0.0102512	0.0031702	0.00128061	0.0187468	0.000558657	0.0019626
	Nitrospinae	MD2898-B26	0.00949706	0.000333545	0	0.000345925	0	0
	Parcubacteria	Candidatus Adlerbacteria	0.00751918	0.00725793	0	0.0307379	0	0.00259401
	Cyanobacteria	ML635J-21	0.00729998	0.012687	0.00114433	0	0.0106896	0.00795559
	Nitrospinae	MD2896-B214	0.00539735	0.000500317	0	0	0	0
	Acidobacteria	d142	0.00527554	0.000360628	0	0	0	0
	Fibrobacteres	Chitinivibrionia	0.00434466	0.00760503	0	0.157703	0.0106444	0.026555
	Fusobacteria	Fusobacteriia	0.00425975	0	0	0.000345925	0	0.00165271
	Verrucomicrobia	S-BQ2-57 soil group	0.00421246	0.00875927	0	0	0	0
	Parcubacteria	Candidatus Azambacteria	0.00395733	0.00396691	0	0.0591123	0.00151513	0.00222777
	Acidobacteria	Subgroup 15	0.00394091	0	0	0	0	0
	Microgenomates	Candidatus Beckwithbacteria	0.00379086	0.00167725	0	0.0197956	0.00252017	0.00423508
	Tenericutes	Mollicutes	0.0036372	0.000400994	0	0.0023558	0.00403802	0.00433838
	Bacteroidetes	Bacteroidetes vadinHA17	0.00327452	0.00955045	0	0.0301488	0.0154551	0.0175514
	Parcubacteria	Candidatus Uhrbacteria	0.00325834	0.0111919	0.00262266	0.000807158	0.00344349	0.0331818
	Chloroflexi	TK10	0.00298225	0.0166374	0	0	0	0
	Saccharibacteria	wastewater metagenome	0.00288216	0	0	0	0	0
	Planctomycetes	MBMPE71	0.00283936	0	0	0	0	0
	Parcubacteria	groundwater metagenome	0.00219869	0.0024606	0	0.0373883	0.0102396	0.215917
	Parcubacteria	marine metagenome	0.00125196	0.000718157	0	0.00144132	0	0
	Actinobacteria	MB-A2-108	0.00125196	0.000833861	0	0	0	0
	Actinobacteria	KIST-JJY010	0.00115512	0.000598464	0	0	0	0
	Acidobacteria	Subgroup 2	0.000850688	0.00428216	0	0	0	0
	Parcubacteria	Candidatus Yanofskybacteria	0.000824472	0	0	0	0	0
	Planctomycetes	SPG12-401-411-B72	0.000705565	0	0	0	0	0
	Parcubacteria	Candidatus Wolfebacteria	0.000564452	0	0	0.0065713	0	0
	Bacteroidetes	SBXY-6786	0.000501595	0	0	0	0	0
	Parcubacteria	Candidatus Falkowbacteria	0.000401276	0.0075331	0	0.088877	0.00159668	0.0019786
	Actinobacteria	Coriobacteriia	0.000401276	0	0	0	0.00112014	0.000619768
	Microgenomates	Candidatus Collierbacteria	0.000248499	0.00131662	0	0.00115308	0	0
	WS2	bacterium enrichment culture clone Anammox_3	0.000200638	0	0	0	0	0
	Euryarchaeota	Halobacteria	0	0	0	0	0.00266604	0.000589706
	Euryarchaeota	Thermoplasmata	0	0	0	0.00409242	0	0
	Woesearchaeota (DHVEG-6)	Nanoarchaeota archaeon SCGC AAA011-D5	0	0	0	0.00102426	0	0
	Bacteroidetes	SM1A07	0	0.00108188	0.00072997	0.0192084	0.00312369	0.00203583
	Bacteroidetes	ML602M-17	0	0	0	0.000859999	0	0
	Proteobacteria	Zetaproteobacteria	0	0	0	0.363419	0.0107004	0.196398
	Proteobacteria	ARKDMS-49	0	0.000739703	0	0	0	0
	Latescibacteria	Latescibacteria Incertae Sedis	0	0.000360628	0	0.00558169	0.00123966	0.00295185
	Chlamydiae	LD1-PA32	0	0	0	0.00461	0.000695846	0
	Lentisphaerae	Lentisphaeria	0	0.00083785	0.00060402	0.0228036	0.000688698	0.00510753
	Verrucomicrobia	LD1-PB3	0	0	0	0	0.00180326	0
	Verrucomicrobia	MSBL3	0	0	0	0.00215095	0.00206609	0.00306362
	Parcubacteria	Parcubacteria group bacterium GW2011_GWA2_43_13	0	0.00260513	0	0	0	0
	Parcubacteria	Parcubacteria group bacterium GW2011_GWD2_42_14	0	0	0	0.0137139	0.00694224	0
	WS6	candidate division WS6 bacterium OLB20	0	0.00143233	0	0	0	0
	Chloroflexi	Dehalococcoidia	0	0	0	0.00500671	0	0.000353824
	Chloroflexi	SBR2076	0	0	0	0.000230617	0	0
	Chloroflexi	SJA-15	0	0	0	0	0	0.00113624
	Chloroflexi	SJA-68	0	0	0	0	0	0.000491355
	Chloroflexi	Ktedonobacteria	0	0.00512504	0	0	0	0.00032757
	Chloroflexi	Chloroflexia	0	0	0	0	0.00288192	0.00451428
	Firmicutes	Negativicutes	0	0.00280377	0	0	0	0
	Firmicutes	Limnochordia	0	0	0	0.000262059	0	0
	Acidobacteria	Subgroup 13	0	0	0	0.153712	0	0
	Planctomycetes	SGST604	0	0	0	0.00569559	0	0
	Actinobacteria	OPB41	0	0.000239386	0	0	0.0012446	0
	Chloroflexi	JG37-AG-4	0	0.000500317	0	0	0	0
	Acidobacteria	Subgroup 18	0	0	0	0.00173715	0	0
	Gemmatimonadetes	MD2902-B12	0	0	0	0.023366	0	0.000471765
